# Supplementary material for: Genetic Diversity of Mycobacterium tuberculosis in Peru and Exploration of Phylogenetic Associations with Drug Resistance
Source: PubMed Central journal article supplement (PMC3691179; doi:10.1371/journal.pone.0065873), 2013-06-24
Supplement: pone.0065873.s003.pdf [file pone.0065873.s003.pdf]

Supplemental Table S1; Genetic diversity of *M tuberculosis* in Peru, page 11

|                |      |      |   |             |                 |         |     |   |      |                 |
|----------------|------|------|---|-------------|-----------------|---------|-----|---|------|-----------------|
| PER01199920370 | 1999 | 0370 | 1 | ███████████ | 777737607760771 | LAM5    | 93  | 2 | M/0  |                 |
| PER01199910382 | 1999 | 0382 | 1 | ███████████ | 777737607760771 | LAM5    | 93  | 1 | M/0  |                 |
| PER01199930446 | 1999 | 0446 | 1 | ███████████ | 777737607760771 | LAM5    | 93  | 3 | M/0  | INH resist      |
| PER01199930450 | 1999 | 0450 | 1 | ███████████ | 777737607760771 | LAM5    | 93  | 3 | F/0  | INH resist      |
| PER01200220660 | 2002 | 0660 | 1 | ███████████ | 777737607760771 | LAM5    | 93  | 2 | M/17 |                 |
| PER01200220697 | 2002 | 0697 | 1 | ███████████ | 777737607760771 | LAM5    | 93  | 2 | M/32 | HIV+            |
| PER01200220714 | 2002 | 0714 | 1 | ███████████ | 777737607760771 | LAM5    | 93  | 2 | M/40 | HIV+            |
| PER01200310726 | 2003 | 0726 | 1 | ███████████ | 777737607760771 | LAM5    | 93  | 1 | M/34 | HIV+            |
| PER01200310747 | 2003 | 0747 | 1 | ███████████ | 777737607760771 | LAM5    | 93  | 1 | M/42 | HIV+            |
| PER01200030273 | 2000 | 0273 | 1 | ███████████ | 77777607560731  | LAM6    | 95  | 3 | F/38 | RIF resist HIV+ |
| PER01199910386 | 1999 | 0386 | 1 | ███████████ | 77777607560731  | LAM6    | 95  | 1 | M/55 |                 |
| PER01199910394 | 1999 | 0394 | 1 | ███████████ | 75777777720771  | H3      | 99  | 1 | F/0  |                 |
| PER01200110647 | 2001 | 0647 | 1 | ███████████ | 75777777720771  | H3      | 99  | 1 | F/50 |                 |
| PER01199910232 | 1999 | 0232 | 1 | ███████████ | 776177400000171 | Unknown | 106 | 1 | M/38 | HIV+            |
| PER01199910374 | 1999 | 0374 | 1 | ███████████ | 776177400000171 | Unknown | 106 | 1 | F/0  |                 |
| PER01200310154 | 2003 | 0154 | 1 | ███████████ | 77777677760771  | X1      | 119 | 1 | M/30 |                 |
| PER01200310155 | 2003 | 0155 | 1 | ███████████ | 77777677760771  | X1      | 119 | 1 | F/33 |                 |
| PER01200310763 | 2003 | 0763 | 1 | ███████████ | 77777677760771  | X1      | 119 | 1 | M/26 | HIV+            |
| PER01200410781 | 2004 | 0781 | 1 | ███████████ | 77777677760771  | X1      | 119 | 1 | M/39 | HIV+            |
| PER01200430026 | 2004 | 0026 | 1 | ███████████ | 776177607760731 | LAM3    | 130 | 3 | F/68 | INH resist      |
| PER01200310103 | 2003 | 0103 | 1 | ███████████ | 776177607760731 | LAM3    | 130 | 1 | F/32 |                 |
| PER01199910392 | 1999 | 0392 | 1 | ███████████ | 776177607760731 | LAM3    | 130 | 1 | F/0  |                 |
| PER01200020541 | 2000 | 0541 | 1 | ███████████ | 776177607760731 | LAM3    | 130 | 2 | M/31 |                 |
| PER01200110640 | 2001 | 0640 | 1 | ███████████ | 776177607760731 | LAM3    | 130 | 1 | F/31 |                 |
| PER01200210691 | 2002 | 0691 | 1 | ███████████ | 776177607760731 | LAM3    | 130 | 1 | 0/0  | HIV+            |
| PER01200310742 | 2003 | 0742 | 1 | ███████████ | 776177607760731 | LAM3    | 130 | 1 | F/26 | HIV+            |
| PER01200430182 | 2004 | 0182 | 1 | ███████████ | 77777606000031  | Unknown | 132 | 3 | F/24 | INH resist      |
| PER01200410184 | 2004 | 0184 | 1 | ███████████ | 37777607760771  | LAM9    | 177 | 1 | M/71 |                 |
| PER01199910426 | 1999 | 0426 | 1 | ███████████ | 77777377720771  | H3      | 183 | 1 | M/0  |                 |
| PER01200010482 | 2000 | 0482 | 1 | ███████████ | 77777377720771  | H3      | 183 | 1 | F/0  |                 |
| PER01200010489 | 2000 | 0489 | 1 | ███████████ | 77777377720771  | H3      | 183 | 1 | M/0  |                 |
| PER01200130601 | 2001 | 0601 | 1 | ███████████ | 00000000003731  | Beijing | 190 | 3 | M/0  | INH resist      |
| PER01200310084 | 2003 | 0084 | 1 | ███████████ | 776137607760771 | LAM3    | 211 | 1 | M/24 |                 |
| PER01199910353 | 1999 | 0353 | 1 | ███████████ | 777703777360771 | T       | 215 | 1 | F/0  |                 |
| PER01200030481 | 2000 | 0481 | 1 | ███████████ | 777717607760771 | LAM5    | 216 | 3 | M/0  | RIF resist      |
| PER01200010490 | 2000 | 0490 | 1 | ███████████ | 777717607760771 | LAM5    | 216 | 1 | M/0  |                 |
| PER01200010572 | 2000 | 0572 | 1 | ███████████ | 777717607760771 | LAM5    | 216 | 1 | F/0  |                 |
| PER01200320089 | 2003 | 0089 | 1 | ███████████ | 77774077760771  | T1      | 219 | 2 | M/23 |                 |
| PER01200030286 | 2000 | 0286 | 1 | ███████████ | 77774077760771  | T1      | 219 | 3 | M/40 | INH resist HIV+ |
| PER01199920389 | 1999 | 0389 | 1 | ███████████ | 77774077760771  | T1      | 219 | 2 | M/0  |                 |
| PER01199930417 | 1999 | 0417 | 1 | ███████████ | 77774077760771  | T1      | 219 | 3 | M/0  | INH resist      |
| PER01199920429 | 1999 | 0429 | 1 | ███████████ | 77774077760771  | T1      | 219 | 2 | M/0  |                 |
| PER01200410037 | 2004 | 0037 | 1 | ███████████ | 777774077560771 | Unknown | 222 | 1 | M/23 |                 |
| PER01200510057 | 2005 | 0057 | 1 | ███████████ | 777774077560771 | Unknown | 222 | 1 | M/44 |                 |
| PER01200530067 | 2005 | 0067 | 1 | ███████████ | 777774077560771 | Unknown | 222 | 3 | F/30 | INH resist      |
| PER01200530068 | 2005 | 0068 | 1 | ███████████ | 777774077560771 | Unknown | 222 | 3 | F/25 | INH resist      |
| PER01200320076 | 2003 | 0076 | 1 | ███████████ | 777774077560771 | Unknown | 222 | 2 | M/63 |                 |
| PER01200430188 | 2004 | 0188 | 1 | ███████████ | 777774077560771 | Unknown | 222 | 3 | M/24 | INH resist      |
| PER01200430213 | 2004 | 0213 | 1 | ███████████ | 777774077560771 | Unknown | 222 | 3 | M/25 | RIF resist      |
| PER01199910262 | 1999 | 0262 | 1 | ███████████ | 777774077560771 | Unknown | 222 | 1 | F/42 | HIV+            |
| PER01200010284 | 2000 | 0284 | 1 | ███████████ | 777774077560771 | Unknown | 222 | 1 | M/34 | HIV+            |







Supplemental Table S1; Genetic diversity of *M tuberculosis* in Peru, page 15

|                |      |      |   |       |                 |         |       |   |      |            |      |
|----------------|------|------|---|-------|-----------------|---------|-------|---|------|------------|------|
| PER01200410196 | 2004 | 0196 | 1 | □□□□■ | 037777407560731 | LAM     | 2274  | 1 | M/22 |            |      |
| PER01200410202 | 2004 | 0202 | 1 | □□□□■ | 037777407560731 | LAM     | 2274  | 1 | F/19 |            |      |
| PER01199910467 | 1999 | 0467 | 1 | □□□□■ | 037777407560731 | LAM     | 2274  | 1 | M/0  |            |      |
| PER01200010557 | 2000 | 0557 | 1 | □□□□■ | 037777407560731 | LAM     | 2274  | 1 | M/0  |            |      |
| PER01200310761 | 2003 | 0761 | 1 | □□□□■ | 037777407560731 | LAM     | 2274  | 1 | M/22 |            | HIV+ |
| PER01200510049 | 2005 | 0049 | 1 | ■     | 77767777720771  | H3      | 2381  | 1 | M/49 |            |      |
| PER01200230707 | 2002 | 0707 | 1 | ■     | 757737607760771 | LAM5    | 2383  | 3 | M/45 | INH resist | HIV+ |
| PER01200410177 | 2004 | 0177 | 1 | ■     | 776177607700171 | LAM3    | 2626  | 1 | M/18 |            |      |
| PER01200210332 | 2002 | 0332 | 1 | ■     | 77777777700071  | Unknown | 2744  | 1 | M/43 |            | HIV+ |
| PER01199910415 | 1999 | 0415 | 1 | ■     | 77777747720771  | H3      | 2885  | 1 | F/0  |            |      |
| PER01200010504 | 2000 | 0504 | 1 | ■     | 776377777360771 | S       | 2916  | 1 | M/19 |            |      |
| PER01200420036 | 2004 | 0036 | 1 | ■     | 400000071760571 | Unknown | 2961* | 2 | M/34 |            |      |
| PER01200020523 | 2000 | 0523 | 1 | ■     | 400000071760571 | Unknown | 2961* | 2 | M/22 |            |      |
| PER01200330073 | 2003 | 0073 | 1 | ■     | 757777407560731 | LAM     | 3000* | 3 | F/24 | INH resist |      |
| PER01200230713 | 2002 | 0713 | 1 | ■     | 757777407560731 | LAM     | 3000* | 3 | M/39 | INH resist | HIV+ |
| PER01200330746 | 2003 | 0746 | 1 | ■     | 757777407560731 | LAM     | 3000* | 3 | M/44 | INH resist | HIV+ |
| PER01200320118 | 2003 | 0118 | 1 | ■     | 777774077020771 | H3      | 3001* | 2 | M/19 |            |      |
| PER01200320142 | 2003 | 0142 | 1 | ■     | 777774077020771 | H3      | 3001* | 2 | F/18 |            |      |
| PER01200420204 | 2004 | 0204 | 1 | ■     | 777774077020771 | H3      | 3001* | 2 | F/26 |            |      |
| PER01200420206 | 2004 | 0206 | 1 | ■     | 777774077020771 | H3      | 3001* | 2 | F/43 |            |      |
| PER01200410222 | 2004 | 0222 | 1 | ■     | 777774077020771 | H3      | 3001* | 1 | F/23 |            |      |
| PER01200220699 | 2002 | 0699 | 1 | ■     | 777774077020771 | H3      | 3001* | 2 | M/38 |            | HIV+ |
| PER01200320741 | 2003 | 0741 | 1 | ■     | 777774077020771 | H3      | 3001* | 2 | M/40 |            | HIV+ |
| PER01200520801 | 2005 | 0801 | 1 | ■     | 777774077020771 | H3      | 3001* | 2 | M/31 |            | HIV+ |
| PER01200310134 | 2003 | 0134 | 1 | ■     | 776377777000000 | Unknown | 3004* | 1 | F/32 |            |      |
| PER01200410791 | 2004 | 0791 | 1 | ■     | 776377777000000 | Unknown | 3004* | 1 | M/34 |            | HIV+ |
| PER01200310135 | 2003 | 0135 | 1 | ■     | 60377677560771  | T       | 3005* | 1 | M/29 |            |      |
| PER01200310136 | 2003 | 0136 | 1 | ■     | 60377677560771  | T       | 3005* | 1 | F/36 |            |      |
| PER01200410175 | 2004 | 0175 | 1 | ■     | 57777607760731  | LAM4    | 3006* | 1 | M/49 |            |      |
| PER01200010539 | 2000 | 0539 | 1 | ■     | 57777607760731  | LAM4    | 3006* | 1 | F/0  |            |      |
| PER01200410179 | 2004 | 0179 | 1 | ■     | 776377770360771 | S       | 3007* | 1 | M/23 |            |      |
| PER01200410180 | 2004 | 0180 | 1 | ■     | 77677774020771  | H1      | 3008* | 1 | F/20 |            |      |
| PER01200130314 | 2001 | 0314 | 1 | ■     | 77777377760171  | T1      | 3009* | 3 | F/39 | INH resist | HIV+ |
| PER01200330745 | 2003 | 0745 | 1 | ■     | 77777377760171  | T1      | 3009* | 3 | M/47 | RIF resist | HIV+ |
| PER01199910363 | 1999 | 0363 | 1 | ■     | 77637777740731  | S       | 3010* | 1 | F/17 |            |      |
| PER01199910403 | 1999 | 0403 | 1 | ■     | 743774077560731 | Unknown | 3011* | 1 | M/23 |            |      |
| PER01200010515 | 2000 | 0515 | 1 | ■     | 743774077560731 | Unknown | 3011* | 1 | M/0  |            |      |
| PER01200210701 | 2002 | 0701 | 1 | ■     | 743774077560731 | Unknown | 3011* | 1 | M/22 |            | HIV+ |
| PER01200410797 | 2004 | 0797 | 1 | ■     | 743774077560731 | Unknown | 3011* | 1 | M/27 |            | HIV+ |
| PER01199910406 | 1999 | 0406 | 1 | ■     | 777774070000171 | Unknown | 3012* | 1 | F/0  |            |      |
| PER01199910457 | 1999 | 0457 | 1 | ■     | 777774070000171 | Unknown | 3012* | 1 | F/0  |            |      |
| PER01199930460 | 1999 | 0460 | 1 | ■     | 37777737760771  | T4      | 3013* | 3 | F/0  | INH resist |      |
| PER01200010496 | 2000 | 0496 | 1 | ■     | 37777737760771  | T4      | 3013* | 1 | M/0  |            |      |
| PER01200110618 | 2001 | 0618 | 1 | ■     | 37777737760771  | T4      | 3013* | 1 | M/0  |            |      |
| PER01200230667 | 2002 | 0667 | 1 | ■     | 67777607700771  | Unknown | 3014* | 3 | F/28 | RIF resist |      |
| PER01200210717 | 2002 | 0717 | 1 | ■     | 07777677760701  | X1      | 3015* | 1 | M/46 |            | HIV+ |
| PER01200310725 | 2003 | 0725 | 1 | ■     | 07777677760701  | X1      | 3015* | 1 | M/31 |            | HIV+ |
| PER01200330723 | 2003 | 0723 | 1 | ■     | 60000000560771  | Unknown | 3016* | 3 | M/29 | INH resist | HIV+ |
| PER01200310756 | 2003 | 0756 | 1 | ■     | 77777777120771  | H3      | 3017* | 1 | M/31 |            | HIV+ |
| PER01200430788 | 2004 | 0788 | 1 | ■     | 77777777120771  | H3      | 3017* | 3 | M/38 | RIF resist | HIV+ |
| PER01200430790 | 2004 | 0790 | 1 | ■     | 77777777120771  | H3      | 3017* | 3 | F/60 | RIF resist | HIV+ |
