# Supplementary material for: Genetic Diversity of Mycobacterium tuberculosis in Peru and Exploration of Phylogenetic Associations with Drug Resistance
Source: PLoS One. 2013 Jun 24;8(6):e65873. doi: 10.1371/journal.pone.0065873 (PMC3691179; doi:10.1371/journal.pone.0065873)
Supplement: Table S2 — A comparison of the proportion of the most predominant SITs found in Peru as compared to neighbouring countries (Brazil, Colombia) and regions (Central America and Caribbean), recorded in the SITVIT2 database as consulted on 9 April 2013. (PDF) [file pone.0065873.s004.pdf]

**Supplemental Table S2** : A comparison of the proportion of the most predominant SITs found in Peru as compared to neighbouring countries (Brazil, Colombia) and regions (Central America and Caribbean), recorded in the SITVIT2 database as consulted on 9<sup>th</sup> April 2013.

| SIT  | Spoligotype Description        | Octal code       | This study<br>n/t (%) | Distribution in neighboring countries |          |                     |          |                         |          |
|------|--------------------------------|------------------|-----------------------|---------------------------------------|----------|---------------------|----------|-------------------------|----------|
|      |                                |                  |                       | BRAZIL<br>n/t (%)                     | p values | COLOMBIA<br>n/t (%) | p values | AMER-C/CARIB<br>n/t (%) | p values |
| 1    | □□□□□□□□□□□□□□□□□□□□□□■□□□□□□□ | 0000000000003771 | 44/794 (5.54)         | 17/4556 (0.37)                        | <0.0001* | 1/432 (0.23)        | <0.0001* | 65/3197 (2.03)          | <0.0001* |
| 33   | ■□□□□□□□□□■□□□□□□□□□□□□□□□□□   | 776177607760771  | 66/794 (8.31)         | 132/4556 (2.90)                       | <0.0001* | 3/432 (0.69)        | <0.0001* | 74/3197 (2.31)          | <0.0001* |
| 42   | ■□□□□□□□□□□□□□□□□□□□□□□□□□□□   | 777777607760771  | 59/794 (7.43)         | 401/4556 (8.80)                       | 0.2035   | 93/432 (21.53)      | <0.0001* | 206/3197 (6.44)         | 0.3173   |
| 47   | ■□□□□□□□□□□□□□□□□□□□□□□□□□□□   | 77777774020771   | 31/794 (3.9)          | 110/4556 (2.41)                       | 0.0156*  | 2/432 (0.46)        | <0.0004* | 58/3197 (1.81)          | <0.0004* |
| 50   | ■□□□□□□□□□□□□□□□□□□□□□□□□□□□   | 777777777720771  | 130/794 (16.37)       | 239/4556 (5.25)                       | <0.0001* | 14/432 (3.24)       | <0.0001* | 160/3197 (5.00)         | <0.0001* |
| 53   | ■□□□□□□□□□□□□□□□□□□□□□□□□□□□   | 777777777760771  | 98/794 (12.34)        | 322/4556 (7.07)                       | <0.0001* | 28/432 (6.48)       | <0.0013* | 359/3197 (11.23)        | 0.3779   |
| 91   | ■□□□□□□□□□■□□□□□□□□□□□□□□□□□   | 700036777760771  | 22/794 (2.77)         | 4/4556 (0.09)                         | <0.0001* | 7/432 (1.62)        | 0.2054   | 37/3197 (1.16)          | <0.0008* |
| 222  | ■□□□□□□□□□□□□□□□□□□□□□□□□□□□   | 777774077560771  | 24/794 (3.02)         | 0/4556 (0.00)                         | <0.0001* | 1/432 (0.23)        | <0.0010* | 1/3197 (0.03)           | <0.0001* |
| 1355 | ■□□□□□□□□□□□□□□□■□□□□□□□□□□□   | 777777407560731  | 24/794 (3.02)         | 0/4556 (0.00)                         | <0.0001* | 0/432 (0.00)        | <0.0003* | 0/3197 (0.00)           | <0.0001* |

\* Asterisk denotes statistically significant differences ( $p < 0.05$ ); Pearson's Chi-square test was used when more than 80% of data had a value greater than 5, and Fisher's Exact Test for remaining data with smaller values (at least 20% of data having values less than 5).
